# Supplementary material for: Development, and Internal, and External Validation of a Scoring System to Predict 30-Day Mortality after Having a Traffic Accident Traveling by Private Car or Van: An Analysis of 164,790 Subjects and 79,664 Accidents
Source: MDPI journal article supplement (doi:10.3390/ijerph17249518), 2020-12-18
Supplement: s1 [file s1]

Table S3: Spline functions for the age of the vehicle variable.

| <b>Age (years)</b> | <b>S1</b> | <b>S2</b> | <b>S3</b> | <b>S4</b> | <b>S5</b> | <b>S6</b> |
|--------------------|-----------|-----------|-----------|-----------|-----------|-----------|
| <b>0</b>           | 0.00      | 0.00      | 0.00      | 0.00      | 0.00      | 0.00      |
| <b>1</b>           | 0.43      | 0.05      | 0.00      | 0.00      | 0.00      | 0.00      |
| <b>2</b>           | 0.59      | 0.18      | 0.01      | 0.00      | 0.00      | 0.00      |
| <b>3</b>           | 0.56      | 0.34      | 0.04      | 0.00      | 0.00      | 0.00      |
| <b>4</b>           | 0.42      | 0.49      | 0.09      | 0.00      | 0.00      | 0.00      |
| <b>5</b>           | 0.25      | 0.58      | 0.17      | 0.00      | 0.00      | 0.00      |
| <b>6</b>           | 0.13      | 0.59      | 0.28      | 0.00      | 0.00      | 0.00      |
| <b>7</b>           | 0.05      | 0.52      | 0.42      | 0.00      | 0.00      | 0.00      |
| <b>8</b>           | 0.02      | 0.41      | 0.57      | 0.00      | 0.00      | 0.00      |
| <b>9</b>           | 0.00      | 0.28      | 0.70      | 0.01      | 0.00      | 0.00      |
| <b>10</b>          | 0.00      | 0.17      | 0.81      | 0.02      | 0.00      | 0.00      |
| <b>11</b>          | 0.00      | 0.09      | 0.88      | 0.04      | 0.00      | 0.00      |
| <b>12</b>          | 0.00      | 0.04      | 0.90      | 0.06      | 0.00      | 0.00      |
| <b>13</b>          | 0.00      | 0.01      | 0.91      | 0.08      | 0.00      | 0.00      |
| <b>14</b>          | 0.00      | 0.00      | 0.89      | 0.11      | 0.00      | 0.00      |
| <b>15</b>          | 0.00      | 0.00      | 0.86      | 0.13      | 0.00      | 0.00      |
| <b>16</b>          | 0.00      | 0.00      | 0.84      | 0.16      | 0.00      | 0.00      |
| <b>17</b>          | 0.00      | 0.00      | 0.81      | 0.18      | 0.01      | 0.00      |
| <b>18</b>          | 0.00      | 0.00      | 0.79      | 0.20      | 0.01      | 0.00      |
| <b>19</b>          | 0.00      | 0.00      | 0.76      | 0.22      | 0.01      | 0.00      |
| <b>20</b>          | 0.00      | 0.00      | 0.74      | 0.24      | 0.02      | 0.00      |
| <b>21</b>          | 0.00      | 0.00      | 0.72      | 0.26      | 0.02      | 0.00      |

|           |      |      |      |      |      |      |
|-----------|------|------|------|------|------|------|
| <b>22</b> | 0.00 | 0.00 | 0.69 | 0.28 | 0.02 | 0.00 |
| <b>23</b> | 0.00 | 0.00 | 0.67 | 0.30 | 0.03 | 0.00 |
| <b>24</b> | 0.00 | 0.00 | 0.65 | 0.31 | 0.04 | 0.00 |
| <b>25</b> | 0.00 | 0.00 | 0.63 | 0.33 | 0.04 | 0.00 |
| <b>26</b> | 0.00 | 0.00 | 0.61 | 0.34 | 0.05 | 0.00 |
| <b>27</b> | 0.00 | 0.00 | 0.59 | 0.36 | 0.05 | 0.00 |
| <b>28</b> | 0.00 | 0.00 | 0.57 | 0.37 | 0.06 | 0.00 |
| <b>29</b> | 0.00 | 0.00 | 0.55 | 0.38 | 0.07 | 0.00 |
| <b>30</b> | 0.00 | 0.00 | 0.53 | 0.39 | 0.08 | 0.00 |
| <b>31</b> | 0.00 | 0.00 | 0.51 | 0.40 | 0.08 | 0.00 |
| <b>32</b> | 0.00 | 0.00 | 0.49 | 0.41 | 0.09 | 0.01 |
| <b>33</b> | 0.00 | 0.00 | 0.47 | 0.42 | 0.10 | 0.01 |
| <b>34</b> | 0.00 | 0.00 | 0.46 | 0.43 | 0.11 | 0.01 |
| <b>35</b> | 0.00 | 0.00 | 0.44 | 0.43 | 0.12 | 0.01 |
| <b>36</b> | 0.00 | 0.00 | 0.42 | 0.44 | 0.13 | 0.01 |
| <b>37</b> | 0.00 | 0.00 | 0.41 | 0.45 | 0.14 | 0.01 |
| <b>38</b> | 0.00 | 0.00 | 0.39 | 0.45 | 0.15 | 0.01 |
| <b>39</b> | 0.00 | 0.00 | 0.38 | 0.46 | 0.15 | 0.01 |
| <b>40</b> | 0.00 | 0.00 | 0.36 | 0.46 | 0.16 | 0.02 |
| <b>41</b> | 0.00 | 0.00 | 0.35 | 0.46 | 0.17 | 0.02 |
| <b>42</b> | 0.00 | 0.00 | 0.33 | 0.46 | 0.18 | 0.02 |
| <b>43</b> | 0.00 | 0.00 | 0.32 | 0.46 | 0.19 | 0.02 |
| <b>44</b> | 0.00 | 0.00 | 0.31 | 0.47 | 0.20 | 0.03 |
| <b>45</b> | 0.00 | 0.00 | 0.29 | 0.47 | 0.21 | 0.03 |

|            |      |      |      |      |      |      |
|------------|------|------|------|------|------|------|
| <b>46</b>  | 0.00 | 0.00 | 0.28 | 0.47 | 0.22 | 0.03 |
| <b>47</b>  | 0.00 | 0.00 | 0.27 | 0.46 | 0.23 | 0.03 |
| <b>49</b>  | 0.00 | 0.00 | 0.24 | 0.46 | 0.25 | 0.04 |
| <b>50</b>  | 0.00 | 0.00 | 0.23 | 0.46 | 0.26 | 0.04 |
| <b>51</b>  | 0.00 | 0.00 | 0.22 | 0.45 | 0.27 | 0.05 |
| <b>67</b>  | 0.00 | 0.00 | 0.09 | 0.35 | 0.41 | 0.14 |
| <b>77</b>  | 0.00 | 0.00 | 0.05 | 0.26 | 0.45 | 0.25 |
| <b>103</b> | 0.00 | 0.00 | 0.00 | 0.03 | 0.26 | 0.70 |
| <b>114</b> | 0.00 | 0.00 | 0.00 | 0.00 | 0.00 | 1.00 |

Abbreviations: S, B-spline function.
