# Supplementary material for: Development, and Internal, and External Validation of a Scoring System to Predict 30-Day Mortality after Having a Traffic Accident Traveling by Private Car or Van: An Analysis of 164,790 Subjects and 79,664 Accidents
Source: MDPI journal article supplement (doi:10.3390/ijerph17249518), 2020-12-18
Supplement: s1 [file s1]

Table S1: Spline functions for the age variable.

| <b>Age (years)</b> | <b>S1</b> | <b>S2</b> | <b>S3</b> | <b>S4</b> | <b>S5</b> | <b>S6</b> |
|--------------------|-----------|-----------|-----------|-----------|-----------|-----------|
| <b>0</b>           | 0.00      | 0.00      | 0.00      | 0.00      | 0.00      | 0.00      |
| <b>1</b>           | 0.11      | 0.00      | 0.00      | 0.00      | 0.00      | 0.00      |
| <b>2</b>           | 0.21      | 0.01      | 0.00      | 0.00      | 0.00      | 0.00      |
| <b>3</b>           | 0.30      | 0.02      | 0.00      | 0.00      | 0.00      | 0.00      |
| <b>4</b>           | 0.37      | 0.03      | 0.00      | 0.00      | 0.00      | 0.00      |
| <b>5</b>           | 0.43      | 0.05      | 0.00      | 0.00      | 0.00      | 0.00      |
| <b>6</b>           | 0.48      | 0.07      | 0.00      | 0.00      | 0.00      | 0.00      |
| <b>7</b>           | 0.53      | 0.10      | 0.00      | 0.00      | 0.00      | 0.00      |
| <b>8</b>           | 0.56      | 0.12      | 0.01      | 0.00      | 0.00      | 0.00      |
| <b>9</b>           | 0.58      | 0.15      | 0.01      | 0.00      | 0.00      | 0.00      |
| <b>10</b>          | 0.59      | 0.18      | 0.01      | 0.00      | 0.00      | 0.00      |
| <b>11</b>          | 0.60      | 0.21      | 0.01      | 0.00      | 0.00      | 0.00      |
| <b>12</b>          | 0.60      | 0.24      | 0.02      | 0.00      | 0.00      | 0.00      |
| <b>13</b>          | 0.59      | 0.28      | 0.02      | 0.00      | 0.00      | 0.00      |
| <b>14</b>          | 0.58      | 0.31      | 0.03      | 0.00      | 0.00      | 0.00      |
| <b>15</b>          | 0.56      | 0.34      | 0.04      | 0.00      | 0.00      | 0.00      |
| <b>16</b>          | 0.54      | 0.37      | 0.04      | 0.00      | 0.00      | 0.00      |
| <b>17</b>          | 0.51      | 0.41      | 0.05      | 0.00      | 0.00      | 0.00      |
| <b>18</b>          | 0.48      | 0.44      | 0.06      | 0.00      | 0.00      | 0.00      |
| <b>19</b>          | 0.45      | 0.46      | 0.07      | 0.00      | 0.00      | 0.00      |
| <b>20</b>          | 0.42      | 0.49      | 0.09      | 0.00      | 0.00      | 0.00      |
| <b>21</b>          | 0.38      | 0.52      | 0.10      | 0.00      | 0.00      | 0.00      |

|           |      |      |      |      |      |      |
|-----------|------|------|------|------|------|------|
| <b>22</b> | 0.35 | 0.54 | 0.11 | 0.00 | 0.00 | 0.00 |
| <b>23</b> | 0.31 | 0.56 | 0.13 | 0.00 | 0.00 | 0.00 |
| <b>24</b> | 0.28 | 0.57 | 0.15 | 0.00 | 0.00 | 0.00 |
| <b>25</b> | 0.25 | 0.58 | 0.17 | 0.00 | 0.00 | 0.00 |
| <b>26</b> | 0.22 | 0.59 | 0.19 | 0.00 | 0.00 | 0.00 |
| <b>27</b> | 0.19 | 0.60 | 0.21 | 0.00 | 0.00 | 0.00 |
| <b>28</b> | 0.17 | 0.60 | 0.23 | 0.00 | 0.00 | 0.00 |
| <b>29</b> | 0.15 | 0.59 | 0.26 | 0.00 | 0.00 | 0.00 |
| <b>30</b> | 0.13 | 0.59 | 0.28 | 0.00 | 0.00 | 0.00 |
| <b>31</b> | 0.11 | 0.58 | 0.31 | 0.00 | 0.00 | 0.00 |
| <b>32</b> | 0.09 | 0.57 | 0.33 | 0.00 | 0.00 | 0.00 |
| <b>33</b> | 0.08 | 0.55 | 0.36 | 0.01 | 0.00 | 0.00 |
| <b>34</b> | 0.07 | 0.54 | 0.39 | 0.01 | 0.00 | 0.00 |
| <b>35</b> | 0.05 | 0.52 | 0.41 | 0.01 | 0.00 | 0.00 |
| <b>36</b> | 0.04 | 0.50 | 0.44 | 0.01 | 0.00 | 0.00 |
| <b>37</b> | 0.04 | 0.48 | 0.47 | 0.02 | 0.00 | 0.00 |
| <b>38</b> | 0.03 | 0.46 | 0.49 | 0.02 | 0.00 | 0.00 |
| <b>39</b> | 0.02 | 0.43 | 0.51 | 0.03 | 0.00 | 0.00 |
| <b>40</b> | 0.02 | 0.41 | 0.54 | 0.04 | 0.00 | 0.00 |
| <b>41</b> | 0.01 | 0.38 | 0.56 | 0.04 | 0.00 | 0.00 |
| <b>42</b> | 0.01 | 0.36 | 0.58 | 0.05 | 0.00 | 0.00 |
| <b>43</b> | 0.01 | 0.33 | 0.60 | 0.06 | 0.00 | 0.00 |
| <b>44</b> | 0.00 | 0.31 | 0.61 | 0.08 | 0.00 | 0.00 |
| <b>45</b> | 0.00 | 0.28 | 0.63 | 0.09 | 0.00 | 0.00 |

|           |      |      |      |      |      |      |
|-----------|------|------|------|------|------|------|
| <b>46</b> | 0.00 | 0.26 | 0.64 | 0.10 | 0.00 | 0.00 |
| <b>47</b> | 0.00 | 0.23 | 0.65 | 0.12 | 0.00 | 0.00 |
| <b>48</b> | 0.00 | 0.21 | 0.66 | 0.13 | 0.00 | 0.00 |
| <b>49</b> | 0.00 | 0.19 | 0.66 | 0.15 | 0.00 | 0.00 |
| <b>50</b> | 0.00 | 0.17 | 0.66 | 0.17 | 0.00 | 0.00 |
| <b>51</b> | 0.00 | 0.15 | 0.66 | 0.19 | 0.00 | 0.00 |
| <b>52</b> | 0.00 | 0.13 | 0.65 | 0.22 | 0.00 | 0.00 |
| <b>53</b> | 0.00 | 0.11 | 0.65 | 0.24 | 0.00 | 0.00 |
| <b>54</b> | 0.00 | 0.10 | 0.64 | 0.26 | 0.00 | 0.00 |
| <b>55</b> | 0.00 | 0.09 | 0.62 | 0.29 | 0.00 | 0.00 |
| <b>56</b> | 0.00 | 0.07 | 0.61 | 0.32 | 0.00 | 0.00 |
| <b>57</b> | 0.00 | 0.06 | 0.59 | 0.34 | 0.01 | 0.00 |
| <b>58</b> | 0.00 | 0.05 | 0.57 | 0.37 | 0.01 | 0.00 |
| <b>59</b> | 0.00 | 0.04 | 0.55 | 0.39 | 0.01 | 0.00 |
| <b>60</b> | 0.00 | 0.04 | 0.53 | 0.42 | 0.02 | 0.00 |
| <b>61</b> | 0.00 | 0.03 | 0.50 | 0.44 | 0.02 | 0.00 |
| <b>62</b> | 0.00 | 0.02 | 0.48 | 0.47 | 0.03 | 0.00 |
| <b>63</b> | 0.00 | 0.02 | 0.45 | 0.49 | 0.04 | 0.00 |
| <b>64</b> | 0.00 | 0.01 | 0.43 | 0.51 | 0.05 | 0.00 |
| <b>65</b> | 0.00 | 0.01 | 0.40 | 0.53 | 0.06 | 0.00 |
| <b>66</b> | 0.00 | 0.01 | 0.37 | 0.55 | 0.07 | 0.00 |
| <b>67</b> | 0.00 | 0.01 | 0.35 | 0.56 | 0.09 | 0.00 |
| <b>68</b> | 0.00 | 0.00 | 0.32 | 0.58 | 0.10 | 0.00 |
| <b>69</b> | 0.00 | 0.00 | 0.29 | 0.59 | 0.12 | 0.00 |

|           |      |      |      |      |      |      |
|-----------|------|------|------|------|------|------|
| <b>70</b> | 0.00 | 0.00 | 0.27 | 0.59 | 0.14 | 0.00 |
| <b>71</b> | 0.00 | 0.00 | 0.24 | 0.60 | 0.16 | 0.00 |
| <b>72</b> | 0.00 | 0.00 | 0.22 | 0.60 | 0.18 | 0.00 |
| <b>73</b> | 0.00 | 0.00 | 0.19 | 0.60 | 0.21 | 0.00 |
| <b>74</b> | 0.00 | 0.00 | 0.17 | 0.59 | 0.24 | 0.00 |
| <b>75</b> | 0.00 | 0.00 | 0.15 | 0.58 | 0.27 | 0.00 |
| <b>76</b> | 0.00 | 0.00 | 0.13 | 0.56 | 0.30 | 0.00 |
| <b>77</b> | 0.00 | 0.00 | 0.11 | 0.54 | 0.34 | 0.00 |
| <b>78</b> | 0.00 | 0.00 | 0.10 | 0.52 | 0.38 | 0.00 |
| <b>79</b> | 0.00 | 0.00 | 0.09 | 0.50 | 0.41 | 0.01 |
| <b>80</b> | 0.00 | 0.00 | 0.07 | 0.47 | 0.45 | 0.01 |
| <b>81</b> | 0.00 | 0.00 | 0.06 | 0.44 | 0.48 | 0.02 |
| <b>82</b> | 0.00 | 0.00 | 0.05 | 0.41 | 0.51 | 0.03 |
| <b>83</b> | 0.00 | 0.00 | 0.04 | 0.37 | 0.54 | 0.04 |
| <b>84</b> | 0.00 | 0.00 | 0.03 | 0.34 | 0.57 | 0.06 |
| <b>85</b> | 0.00 | 0.00 | 0.03 | 0.30 | 0.59 | 0.08 |
| <b>86</b> | 0.00 | 0.00 | 0.02 | 0.27 | 0.60 | 0.11 |
| <b>87</b> | 0.00 | 0.00 | 0.02 | 0.23 | 0.61 | 0.14 |
| <b>88</b> | 0.00 | 0.00 | 0.01 | 0.20 | 0.61 | 0.18 |
| <b>89</b> | 0.00 | 0.00 | 0.01 | 0.17 | 0.60 | 0.23 |
| <b>90</b> | 0.00 | 0.00 | 0.01 | 0.14 | 0.58 | 0.28 |
| <b>91</b> | 0.00 | 0.00 | 0.00 | 0.11 | 0.55 | 0.34 |
| <b>92</b> | 0.00 | 0.00 | 0.00 | 0.08 | 0.51 | 0.40 |
| <b>93</b> | 0.00 | 0.00 | 0.00 | 0.06 | 0.46 | 0.48 |

|           |      |      |      |      |      |      |
|-----------|------|------|------|------|------|------|
| <b>94</b> | 0.00 | 0.00 | 0.00 | 0.04 | 0.40 | 0.56 |
| <b>95</b> | 0.00 | 0.00 | 0.00 | 0.02 | 0.32 | 0.66 |
| <b>96</b> | 0.00 | 0.00 | 0.00 | 0.01 | 0.23 | 0.76 |
| <b>98</b> | 0.00 | 0.00 | 0.00 | 0.00 | 0.00 | 1.00 |

---

Abbreviations: S, B-spline function.
