# Supplementary material for: Development, and Internal, and External Validation of a Scoring System to Predict 30-Day Mortality after Having a Traffic Accident Traveling by Private Car or Van: An Analysis of 164,790 Subjects and 79,664 Accidents
Source: MDPI journal article supplement (doi:10.3390/ijerph17249518), 2020-12-18
Supplement: s1 [file s1]

Table S2: Spline functions for the time variable.

| <b>Time (hours)</b> | <b>S1</b> | <b>S2</b> | <b>S3</b> | <b>S4</b> | <b>S5</b> | <b>S6</b> |
|---------------------|-----------|-----------|-----------|-----------|-----------|-----------|
| <b>0</b>            | 0.00      | 0.00      | 0.00      | 0.00      | 0.00      | 0.00      |
| <b>1</b>            | 0.38      | 0.04      | 0.00      | 0.00      | 0.00      | 0.00      |
| <b>2</b>            | 0.56      | 0.13      | 0.01      | 0.00      | 0.00      | 0.00      |
| <b>3</b>            | 0.59      | 0.26      | 0.02      | 0.00      | 0.00      | 0.00      |
| <b>4</b>            | 0.52      | 0.40      | 0.05      | 0.00      | 0.00      | 0.00      |
| <b>5</b>            | 0.39      | 0.51      | 0.10      | 0.00      | 0.00      | 0.00      |
| <b>6</b>            | 0.25      | 0.58      | 0.17      | 0.00      | 0.00      | 0.00      |
| <b>7</b>            | 0.14      | 0.59      | 0.26      | 0.00      | 0.00      | 0.00      |
| <b>8</b>            | 0.07      | 0.55      | 0.37      | 0.01      | 0.00      | 0.00      |
| <b>9</b>            | 0.03      | 0.47      | 0.48      | 0.02      | 0.00      | 0.00      |
| <b>10</b>           | 0.01      | 0.37      | 0.57      | 0.05      | 0.00      | 0.00      |
| <b>11</b>           | 0.00      | 0.26      | 0.64      | 0.10      | 0.00      | 0.00      |
| <b>12</b>           | 0.00      | 0.17      | 0.66      | 0.18      | 0.00      | 0.00      |
| <b>13</b>           | 0.00      | 0.10      | 0.63      | 0.28      | 0.00      | 0.00      |
| <b>14</b>           | 0.00      | 0.05      | 0.55      | 0.39      | 0.01      | 0.00      |
| <b>15</b>           | 0.00      | 0.02      | 0.45      | 0.49      | 0.04      | 0.00      |
| <b>16</b>           | 0.00      | 0.01      | 0.34      | 0.57      | 0.09      | 0.00      |
| <b>17</b>           | 0.00      | 0.00      | 0.23      | 0.60      | 0.17      | 0.00      |
| <b>18</b>           | 0.00      | 0.00      | 0.13      | 0.57      | 0.30      | 0.00      |
| <b>19</b>           | 0.00      | 0.00      | 0.07      | 0.47      | 0.46      | 0.01      |
| <b>20</b>           | 0.00      | 0.00      | 0.03      | 0.32      | 0.59      | 0.06      |
| <b>21</b>           | 0.00      | 0.00      | 0.01      | 0.17      | 0.61      | 0.22      |

---

|           |      |      |      |      |      |      |
|-----------|------|------|------|------|------|------|
| <b>22</b> | 0.00 | 0.00 | 0.00 | 0.05 | 0.44 | 0.51 |
|-----------|------|------|------|------|------|------|

---

|           |      |      |      |      |      |      |
|-----------|------|------|------|------|------|------|
| <b>23</b> | 0.00 | 0.00 | 0.00 | 0.00 | 0.00 | 1.00 |
|-----------|------|------|------|------|------|------|

---

Abbreviations: S, B-spline function.
