# Supplementary material for: Development, and Internal, and External Validation of a Scoring System to Predict 30-Day Mortality after Having a Traffic Accident Traveling by Private Car or Van: An Analysis of 164,790 Subjects and 79,664 Accidents
Source: Int J Environ Res Public Health. 2020 Dec 18;17(24):9518. doi: 10.3390/ijerph17249518 (PMC7766065; doi:10.3390/ijerph17249518)
Supplement: Supplementary file 1 [file ijerph-17-09518-s001.zip]

Archive with 6 entries (6 files):
- Figure S1.pdf
- Figure S2.pdf
- Figure S3.pdf
- Table S1.pdf
- Table S2.pdf
- Table S3.pdf
