# Supplementary figures and images for: Development, and Internal, and External Validation of a Scoring System to Predict 30-Day Mortality after Having a Traffic Accident Traveling by Private Car or Van: An Analysis of 164,790 Subjects and 79,664 Accidents
Source: MDPI journal article supplement (doi:10.3390/ijerph17249518), 2020-12-18

## 30-day mortality risk

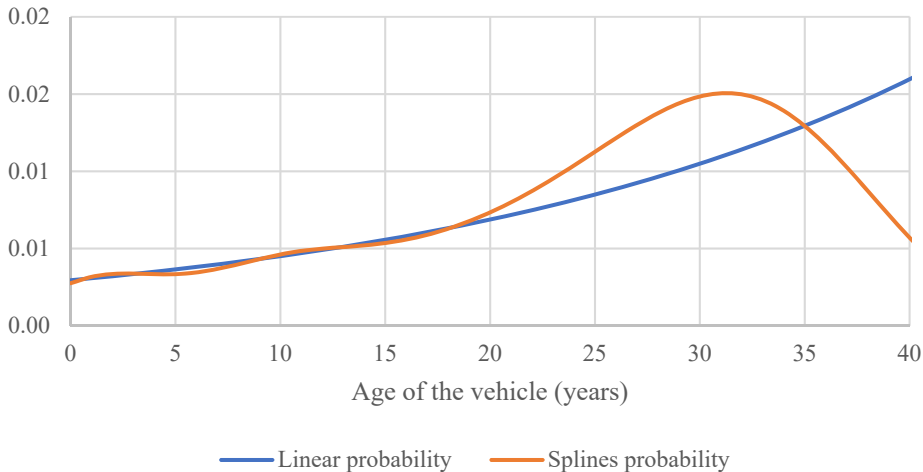

Supplement: s1 [file s1]

## 30-day mortality risk

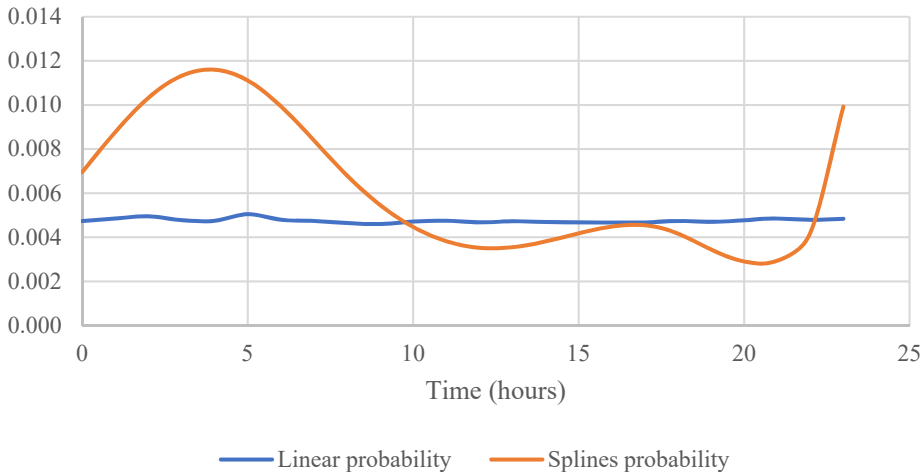

Supplement: s1 [file s1]

## 30-day mortality risk

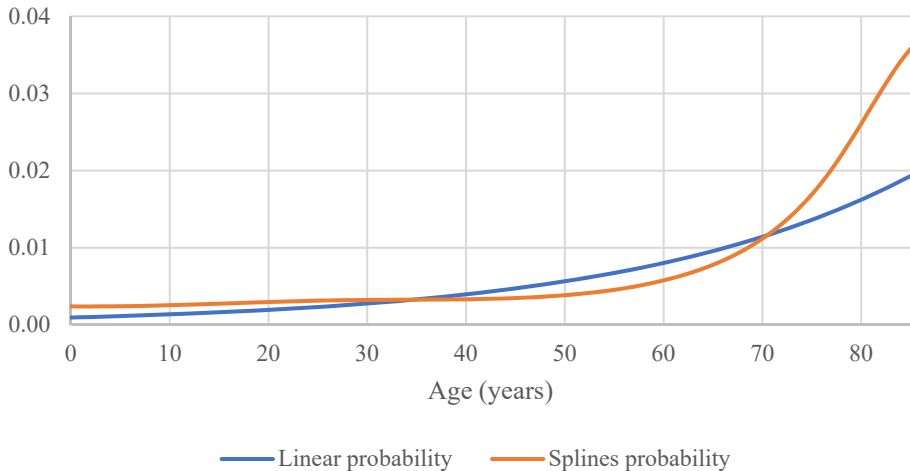

Supplement: s1 [file s1]
